# Supplementary material for: Deep ice as a geochemical reactor: insights from iron speciation and mineralogy of dust in the Talos Dome ice core (East Antarctica)
Source: Copernicus journal article supplement (doi:10.5194/tc-2021-162), 2021-06-29
Supplement: Supplementary file 1 [file CompleteData.xlsx]

## Sheet: Sample Info
Sample Name	Mean Depth (m)	Mean Age (yr BP)	N. of ice sections	mean dust conc. (ngdust g-1ice)	err. (ngdust g-1ice)	total filtered vol. (mL)	Climatic Period	Extracted dust (µg)	Err. (µg)
TD-0269	0269	3201.66	7	28	2	194.2	Holocene	5.3	0.430363
TD-0336	0336	4334.53	10	24	2	277.8	Holocene	6.8	0.633116
TD-0385	0385	5257.78	5	53	4	138.5	Holocene	7.4	0.630803
TD-0422	0422	5989.47	6	25	3	147.8	Holocene	3.7	0.480156
TD-0535	0535	8423.5	5	19	3	121.1	Holocene	2.3	0.385633
TD-0649	0649	11124.5	7	22	6	77.3	Holocene	1.7	0.480249
TD-0666	0666	11526.1	10	21	4	123.6	Holocene	2.6	0.520645
TD-0670	0670	12251.6	5	36	3	133.3	Deglaciation	4.8	0.446906
TD-0694	0694	13867.3	5	33	3	106.3	Deglaciation	3.5	0.352384
TD-0740	0740	15317.9	4	31	2	117.9	Deglaciation	3.7	0.274866
TD-0777	0777	15725.8	2	75	5	55.8	Deglaciation	4.2	0.321042
TD-0786	0786	16317.7	5	245	37	39.3	Deglaciation	9.6	1.54361
TD-0798	0798	17871.1	4	75	9	62.7	Deglaciation	4.7	0.609928
TD-0825	0825	18072.2	1	423	21	20.2	Deglaciation	8.6	0.510989
TD-0828	0828	19162.6	2	202	14	36.1	MIS2	7.3	0.577276
TD-0843	0843	20306.1	3	324	27	58.6	MIS2	19	1.769
TD-0857	0857	22490.1	1	473	41	10.2	MIS2	4.8	0.462973
TD-0879	0879	27709	2	251	12	39.8	MIS2	10.9	0.62763
TD-0927	0927	30843.2	3	390	56	45.3	MIS2	17.7	2.7145
TD-0960	0960	36730.5	6	101	12	49.9	MIS3	3.9	0.501477
TD-1025	1025	37349.7	3	253	17	67.6	MIS3	17.1	1.31611
TD-1033	1033	37936	3	27	5	42.9	MIS3	1.2	0.233949
TD-1041	1041	39353.3	3	26	4	49.8	MIS3	1.3	0.212704
TD-1063	1063	40013.1	3	34	5	38.8	MIS3	1.3	0.20388
TD-1072	1072	40654	4	47	6	56.4	MIS3	2.6	0.357322
TD-1081	1081	41830.2	3	56	6	52	MIS3	2.9	0.339053
TD-1096	1096	41912.7	4	89	5	117.4	MIS3	10.4	0.685898
TD-1097	1097	43268.7	4	74	10	37.8	MIS3	2.8	0.420231
TD-1112	1112	45002.9	4	44	4	71.9	MIS3	3.2	0.322179
TD-1132	1132	47284.6	4	75	5	111.2	MIS3	8.4	0.642085
TD-1163	1163	48808.9	3	46	5	46.5	MIS3	4.1	0.260629
TD-1178	1178	49297.3	2	76	12	51	MIS3	2.2	0.6539
TD-1182	1182	51928.9	4	73	6	54.1	MIS3	3.9	0.174731
TD-1227	1227	55037.4	3	52	6	37.3	MIS3	1.9	4.06759
TD-1265	1265	60865.7	2	1214	148	32.5	MIS4	32.5	1.22465
TD-1289	1289	66689.9	2	191	10	48.4	MIS4	9.3	0.82009
TD-1293	1293	68095	2	239	12	55	MIS5	13.2	0.467853
TD-1297	1297	78248.8	2	140	7	55.4	MIS5	7.8	0.400472
TD-1361	1361	99145.5	4	64	9	106.4	MIS5	6.7	0.99262
TD-1385	1385	115573	5	48	5	138.2	MIS5	6.6	0.387391
TD-1389	1389	118083	6	21	2	158.4	MIS5	3.4	0.357034
TD-1415	1415	130802	5	31	4	123.8	MIS5	3.8	0.527456
TD-1437	1437	152617	1	103	7	30.7	MIS6	3.1	0.240973
TD-1443	1443	154919	1	220	20	24.4	MIS6	5.3	0.53361
TD-1454	1454	162848	2	98	5	61.3	MIS6	6	0.364754
TD-1491	1491	187074	3	33	2	83.7	MIS7	2.8	0.197059
TD-1514	1514	228829	2	65	2	35.5	MIS7	2.3	0.0932448
TD-1530	1530	271732	1	230	30	16.7	MIS8	3.8	0.532786
TD-1536	1536	294820	1	85	12	27.5	MIS9	2.3	0.347181
TD-1554	1554	not dated	1	133	12	29.1	n.a.	3.9	0.38999
TD-1555	1555	not dated	1	143	4	34.8	n.a.	5	0.18872
TD-1576	1576	not dated	3	32	2	97.7	n.a.	3.1	0.224043
TD-1592	1592	not dated	4	30	2	109.6	n.a.	3.3	0.252248
TD-1609	1609	not dated	3	42	6	80.5	n.a.	3.4	0.518939
	AICC2012 Chronology		Veres et al. (2013) Climate of the Past 9:1733-1748			Bazin et al. (2013) Climate of the Past 9:1715-1731
	TALDICE-DEEP		Crotti et al. (submitted)

## Sheet: Elemental Composition
Sample Name	Na2O%	MgO%	Al2O3%	SiO2%	K2O%	CaO%	TiO2%	MnO%	Fe2O3%
TD-0269	4.13866	1.16979	16.2841	68.185	1.91794	1.47302	0.977882	0.0793038	5.7743
TD-0336	2	2	25.3339	60.3278	1.38296	1.69804	2.08839	0.0485186	5.12046
TD-0385	3.18647	1.27476	19.4736	65.3361	1.84336	1.26654	1.47475	0.0442904	6.10015
TD-0422	4.16634	1.4446	27.0818	57.2501	1.23686	1.61153	1.67881	0.0478312	5.48219
TD-0535	2	2.05125	15.1525	68.6331	1.56088	2.36621	1.47155	0.0709925	6.69353
TD-0649	2	1.19157	22.9531	60.7023	1.48259	1.86886	5.06221	0.0525881	4.68675
TD-0666	3.30649	0.545409	9.5306	81.1297	1.09779	0.705882	0.627875	0.0247404	3.03148
TD-0670	2.61216	3.3409	18.6307	65.2794	1.4377	1.4395	1.41169	0.0518929	5.79604
TD-0694	3.10887	1.06859	17.3834	69.206	1.71034	0.804079	1.08472	0.0315714	5.60249
TD-0740	2.79571	1.97185	17.5712	65.157	2.51523	2.29296	1.52349	0.0621088	6.11038
TD-0777	0.123038	1.93109	22.203	63.2596	2.49789	0.853576	1.07857	0.0460599	8.00715
TD-0786	2	1.51753	26.0713	61.4243	1.42035	1.25566	1.11662	0.0420565	5.1521
TD-0798	1.36777	2.32641	19.9951	64.8069	1.89198	1.74748	1.27304	0.0710983	6.52026
TD-0825	1.68716	3.71782	23.2113	61.8964	1.71922	1.1062	0.973329	0.0582744	5.63035
TD-0828	1.77761	4.05932	23.7189	60.9731	1.77557	1.13108	0.967314	0.0677597	5.52934
TD-0843	2	5.71445	25.0624	58.5437	1.6341	0.97008	0.916582	0.0622458	5.09634
TD-0857	1.82636	2.51722	24.985	59.96	1.61052	0.882896	1.26809	0.0907971	6.85912
TD-0879	2.64835	1.51476	18.6072	66.5857	1.88241	1.71419	0.980483	0.0645743	6.00233
TD-0927	1.15326	1.57188	21.7808	65.9102	2.12877	0.991901	0.831995	0.0413318	5.58981
TD-0960	2	2.86847	23.9505	65.1587	1.31981	0.591841	0.556263	0.019095	3.53538
TD-1025	2.74291	0.793746	16.3211	71.3641	1.8838	0.856938	0.905365	0.0331406	5.09892
TD-1033	1.17537	0.29536	14.3229	75.4478	1.82503	0.916221	1.06578	0.0308373	4.92064
TD-1041	2.51575	1.11785	15.3192	68.704	2.08844	2.00855	1.27503	0.10567	6.86545
TD-1063	2.04547	1.13399	17.3383	68.9525	2.15026	1.21258	0.966551	0.0542971	6.14601
TD-1072	1.44852	0.520276	15.1557	74.5928	1.96814	0.64934	0.747923	0.0258078	4.89145
TD-1081	2	1.41265	25.2588	65.1457	1.39507	0.542586	0.565453	0.0194512	3.66031
TD-1096	2.21633	0.798815	15.1462	72.5259	1.66731	1.25338	1.0482	0.0441377	5.29972
TD-1097	1.90941	0.598531	16.2709	72.7611	1.9564	0.66125	0.839553	0.0227135	4.98017
TD-1112	1.60832	0.769191	15.6422	72.2223	2.09316	0.858075	0.980855	0.0309806	5.79499
TD-1132	2.91673	0.957474	14.0254	72.8265	3.12023	0.975981	0.689182	0.0479133	4.44058
TD-1163	1.69921	0.398811	10.6339	77.7355	2.39723	0.512172	0.937879	0.0369493	5.6484
TD-1178	2	0.694657	24.3803	66.3859	1.4673	0.442729	0.602076	0.0207429	4.00626
TD-1182	1.66753	0.467215	14.028	75.8153	1.83149	0.564472	0.949668	0.0230759	4.65321
TD-1227	1.65981	0.743467	14.3803	73.9954	1.78098	0.765612	1.20916	0.0491783	5.41617
TD-1265	6.6798	0.0130914	17.5969	67.0865	3.77024	0.550296	0.244955	0.0813657	3.97691
TD-1289	2	1.5739	29.3755	60.719	1.43418	0.261109	0.531954	0.0210188	4.08328
TD-1293	3.16407	0.902375	19.7809	67.0426	2.08748	0.877629	0.75988	0.0386426	5.34645
TD-1297	1.47326	0.746006	17.7802	71.5079	2.23674	0.439528	0.628649	0.0233393	5.16435
TD-1361	3.48462	0.33774	12.0476	75.3433	2.02126	0.202617	1.01892	0.0212499	5.52273
TD-1385	2	0.226913	16.622	72.0842	3.21861	0.456261	0.59255	0.0552646	4.74426
TD-1389	2.849	0.130555	10.3273	76.7325	1.98188	0.251953	1.25975	0.0274145	6.43956
TD-1415	0.91696	0.12197	11.7046	77.412	2.26967	0.376084	1.08062	0.050781	6.06726
TD-1437	0.233958	0.539157	17.2283	72.8583	2.47419	0.2771	0.768572	0.0384211	5.582
TD-1443	1.74891	0.391006	21.3694	67.5731	3.16158	0.48599	0.553653	0.0578015	4.65854
TD-1454	0.208132	0.472275	17.839	71.838	2.56818	0.193857	0.832168	0.0261788	6.02217
TD-1491	2.22624	0.0755649	8.99558	79.6418	1.88416	0.149265	1.02161	0.0216475	5.98415
TD-1514	2.70212	0.0083891	14.7782	73.762	2.32706	0.300616	0.725791	0.0358359	5.35998
TD-1530	2.6418	0.91395	21.3126	65.1398	2.68418	0.34886	0.909791	0.0363895	6.01265
TD-1536	2.65302	2.97797	11.7233	71.4085	2.80875	0.784794	1.16575	0.0328922	6.44507
TD-1554	0.841058	0.585342	15.6894	72.6603	2.36888	1.05988	1.19196	0.0448038	5.55836
TD-1555	1.06828	0.549395	14.9206	72.3385	2.8186	0.285265	1.19939	0.0380383	6.78193
TD-1576	0.95204	0.203966	7.18323	77.5286	2.21316	0.299443	1.29172	0.0694534	10.2584
TD-1592	0.923353	0.228403	7.70611	83.9649	1.39097	0.209952	0.8195	0.0214697	4.73538
TD-1609	1.97868	0.109624	7.40544	79.9918	1.92712	0.178528	1.04681	0.027032	7.33496

## Sheet: XANES Data
Sample Name	Climatic Period	Age (yr BP)	Fe K-edge Pre-Edge Peak				Fe K-edge
			Centroid Energy (eV)	Error (eV)	Integral Area (arb. unit)	Error (arb. unit)	Main Edge Energy (eV)	Error (eV)
TD-0269	holocene	3201.66	7113.7	0.46	0.13	0.09	7124.82	0.127279
TD-0336	holocene	4334.53	7113.7	0.46	0.14	0.042	7125.31	0.0777817
TD-0385	holocene	5257.78	7114.2	0.46	0.138	0.018	7124.91	0.159154
TD-0422	holocene	5989.47	7113.2	0.46	0.13	0.026	7124.41	0.478783
TD-0535	holocene	8423.5	7113.56	0.46	0.136	0.03	7125.1	0.0989949
TD-0649	holocene	11124.5	7114	0.46	0.149	0.029	7125.27	0.516188
TD-0666	holocene	11526.1	7114.5	0.46	0.155	0.028	7126.22	0.217666
TD-0670	deglaciation	12251.6	7114.5	0.46	0.166	0.045	7126.07	0.217662
TD-0694	deglaciation	13867.3	7114.1	0.46	0.105	0.023	7125.81	0.205061
TD-0740	deglaciation	15317.9	7113.8	0.46	0.122	0.03	7126.13	0.155563
TD-0777	deglaciation	15725.8	7114.6	0.46	0.139	0.04	7125.42	0.141421
TD-0786	deglaciation	16317.7	7113.8	0.46	0.13	0.035	7126.65	0.392715
TD-0798	deglaciation	17871.1	7114.1	0.46	0.153	0.02	7125.28	0.267407
TD-0825	deglaciation	18072.2	7113.9	0.46	0.13	0.025	7125.89	0.0494975
TD-0828	MIS2	19162.6	7113.7	0.46	0.12	0.025	7125.23	0.132791
TD-0843	MIS2	20306.1	7114.1	0.46	0.139	0.023	7125.39	0.23
TD-0857	MIS2	22490.1	7113.8	0.46	0.115	0.031	7125.29	0.217638
TD-0879	MIS2	27709	7113.8	0.46	0.122	0.023	7125.64	0.526656
TD-0927	MIS2	30843.2	7113.6	0.46	0.08	0.024	7125.81	0.0565685
TD-0960	MIS3	36730.5	7113.9	0.46	0.141	0.049	7125.71	0.217651
TD-1025	MIS3	37349.7	7114.3	0.46	0.158	0.026	7125.69	0.0707107
TD-1033	MIS3	37936	7114.5	0.46	0.153	0.035	7126.64	0.346482
TD-1041	MIS3	39353.3	7114.4	0.46	0.18	0.026	7126.95	0.217689
TD-1063	MIS3	40013.1	7114.1	0.46	0.139	0.025	7126.2	0.678823
TD-1072	MIS3	40654	7114.7	0.46	0.163	0.06	7126.01	0.281869
TD-1081	MIS3	41830.2	7114.4	0.46	0.131	0.032	7126.67	0.219203
TD-1096	MIS3	41912.7	7114.7	0.46	0.195	0.06	7126.79	0.282843
TD-1097	MIS3	43268.7	7113.9	0.46	0.1	0.048	7126.51	0.112398
TD-1112	MIS3	45002.9	7114.6	0.46	0.168	0.058	7126.11	0.217663
TD-1132	MIS3	47284.6	7113.9	0.46	0.133	0.041	7126.52	0.217675
TD-1163	MIS3	48808.9	7114.1	0.46	0.128	0.044	7125.84	0.217655
TD-1178	MIS3	49297.3	7114.5	0.46	0.137	0.042	7126.28	0.217668
TD-1182	MIS3	51928.9	7114.5	0.46	0.131	0.081	7126.78	0.551543
TD-1227	MIS3	55037.4	7114.2	0.46	0.128	0.059	7126.77	0.355949
TD-1265	MIS4	60865.7	7114.2	0.46	0.218	0.014	7126.41	0.216333
TD-1289	MIS4	66689.9	7114	0.46	0.082	0.027	7125.71	0.127279
TD-1293	MIS5	68095	7114.1	0.46	0.092	0.021	7126	0.127279
TD-1318	MIS5	78248.8	7114.2	0.46	0.09	0.033	7126.93	0.353553
TD-1361	MIS5	99145.5	7114.3	0.46	0.079	0.028	7127.03	0.0989949
TD-1385	MIS5	115573	7114.3	0.46	0.113	0.021	7126.65	0.0636396
TD-1389	MIS5	118083	7113.9	0.46	0.12	0.0122	7126.73	0.0989949
TD-1415	MIS5	130802	7114.9	0.46	0.096	0.25	7127.29	0.120208
TD-1437	MIS6	152617	7114.2	0.46	0.098	0.029	7127.13	0.0848528
TD-1443	deep	not dated	7114.4	0.46	0.101	0.027	7126.34	0.212132
TD-1454	deep	not dated	7114.6	0.46	0.098	0.033	7127.34	0.127279
TD-1491	deep	not dated	7114.9	0.46	0.116	0.116	7127.38	0.0777817
TD-1514	deep	not dated	7114.6	0.46	0.122	0.078	7127.08	0.106066
TD-1530	deep	not dated	7114.9	0.46	0.103	0.07	7127.4	0.148492
TD-1536	deep	not dated	7114.7	0.46	0.122	0.049	7127.39	0.0777817
TD-1554	n.a.	not dated	7114.9	0.46	0.144	0.078	7127.17	0.141421
TD-1555	n.a.	not dated	7114.3	0.46	0.081	0.053	7127.32	0.240416
TD-1576	n.a.	not dated	7114.4	0.46	0.083	0.027	7127.46	0.212132
TD-1592	n.a.	not dated	7114.3	0.46	0.085	0.029	7127.42	0.00707107
TD-1609	n.a.	not dated	7114.6	0.46	0.096	0.057	7127.38	0.0848528

## Sheet: Fe-Minerals #1
Sample Name	Minerals selcted in the linear combination	Linear Coefficients	Error
TD-0269	Horneblende	0.422	0.008
	Goethite	0.292	0.048
	Hematite	0.236	0.047
	Pyrite	0.05	0.008
TD-0336	Hematite	0.458	0.052
	Horneblende	0.273	0.091
	Goethite	0.201	0.052
	Pyrite	0.068	0.052
TD-0385	Hematite	0.406	0.024
	Schoerlite	0.289	0.03
	Horneblende	0.253	0.049
	Pyrite	0.052	0.007
TD-0422	Horneblende	0.399	0.009
	Goethite	0.386	0.057
	Pyrite	0.117	0.006
	Siderite	0.099	0.007
TD-0535	Goethite	0.365	0.011
	Magnetite	0.333	0.018
	Pargasite	0.234	0.012
	Siderite	0.067	0.026
TD-0649	Muscovite	0.499	0.022
	Goethite	0.319	0.011
	Olivine	0.116	0.011
	Pyrite	0.066	0.011
TD-0666	Goethite	0.595	0.016
	Muscovite	0.309	0.018
	Pyrite	0.06	0.006
	Siderite	0.036	0.027
TD-0694	Goethite	0.714	0.01
	Horneblende	0.162	0.401
	Siderite	0.076	0.011
	Pyrite	0.048	0.01
TD-0740	Goethite	0.784	0.008
	Horneblende	0.132	0.013
	Siderite	0.065	0.021
	Pyrite	0.019	0.08
TD-0777	Goethite	0.363	0.047
	Hematite	0.302	0.047
	Horneblende	0.294	0.047
	Pyrite	0.041	0.093
TD-0786	Goethite	0.626	0.064
	Hematite	0.198	0.091
	Muscovite	0.116	0.043
	Chlorite	0.059	0.016
TD-0798	Muscovite	0.453	0.048
	Goethite	0.259	0.017
	Magnetite	0.227	0.016
	Siderite	0.062	0.006
TD-0825	Goethite	0.616	0.05
	Muscovite	0.205	0.036
	Horneblende	0.147	0.018
	Siderite	0.031	0.009
TD-0828	Goethite	0.341	0.039
	Horneblende	0.331	0.061
	Hematite	0.305	0.046
	Pyrite	0.023	0.008
TD-0843	Muscovite	0.305	0.019
	Goethite	0.256	0.01
	Hematite	0.24	0.01
	Biotite	0.199	0.01
TD-0857	Hematite	0.311	0.029
	Horneblende	0.251	0.009
	Goethite	0.24	0.029
	Muscovite	0.197	0.02
TD-0879	Goethite	0.557	0.025
	Muscovite	0.244	0.037
	Horneblende	0.177	0.177
	Siderite	0.021	0.01
TD-0927	Goethite	0.477	0.059
	Horneblende	0.196	0.015
	Hematite	0.175	0.045
	Muscovite	0.152	0.034
TD-0960	Goethite	0.561	0.02
	Muscovite	0.26	0.027
	Chlorite	0.154	0.051
	Siderite	0.025	0.007
TD-1025	Goethite	0.48	0.028
	Muscovite	0.344	0.025
	Olivine	0.104	0.008
	Pyrite	0.072	0.006
TD-1033	Goethite	0.715	0.035
	Muscovite	0.225	0.022
	Jarosite	0.035	0.067
	Siderite	0.024	0.007
TD-1041	Goethite	0.47	0.029
	Jarosite	0.348	0.023
	Muscovite	0.153	0.018
	Siderite	0.029	0.006
TD-1063	Goethite	0.783	0.005
	Pargasite	0.142	0.008
	Siderite	0.056	0.005
	Pyrite	0.019	0.016
TD-1072	Goethite	0.707	0.018
	Magnetite	0.134	0.029
	Horneblende	0.093	0.017
	Siderite	0.065	0.038
TD-1081	Goethite	0.699	0.034
	Muscovite	0.16	0.022
	Jarosite	0.101	0.064
	Siderite	0.041	0.007
TD-1096	Goethite	0.524	0.047
	Jarosite	0.356	0.032
	Horneblende	0.094	0.012
	Siderite	0.027	0.008
TD-1097	Goethite	0.811	0.009
	Pargasite	0.101	0.014
	Siderite	0.057	0.083
	Pyrite	0.032	0.008
TD-1112	Goethite	0.756	0.005
	Pargasite	0.138	0.007
	Siderite	0.063	0.004
	Pyrite	0.043	0.009
TD-1132	Goethite	0.279	0.069
	Muscovite	0.276	0.012
	Hematite	0.241	0.041
	Jarosite	0.204	0.027
TD-1163	goethite	0.694	0.055
	Horneblende	0.141	0.009
	Pyrite	0.102	0.006
	Siderite	0.063	0.006
TD-1178	Goethite	0.798	0.008
	Horneblende	0.094	0.012
	Siderite	0.067	0.009
	Pyrite	0.04	0.021
TD-1182	Jarosite	0.507	0.021
	Muscovite	0.268	0.01
	Hematite	0.18	0.016
	Pyrite	0.045	0.004
TD-1203	Goethite	0.927	0.055
	Siderite	0.044	0.01
	Chlorite	0.017	0.012
	Pyrite	0.012	0.01
TD-1227	Goethite	0.439	0.025
	Muscovite	0.396	0.016
	Jarosite	0.13	0.031
	Siderite	0.034	0.037
TD-1265	Magnetite	0.704	0.038
	Jarosite	0.192	0.019
	Pyrite	0.066	0.017
	Siderite	0.038	0.059
TD-1289	Goethite	0.616	0.058
	Muscovite	0.152	0.036
	Chlorite	0.139	0.015
	Jarosite	0.093	0.04
TD-1293	Goethite	0.53	0.044
	Jarosite	0.235	0.078
	Horneblende	0.134	0.022
	Muscovite	0.101	0.044
TD-1318	Goethite	0.573	0.044
	Jarosite	0.327	0.04
	Horneblende	0.073	0.016
	Siderite	0.027	0.01
TD-1385	Jarosite	0.349	0.041
	Goethite	0.316	0.06
	Magnetite	0.28	0.081
	Siderite	0.054	0.007
TD-1389	Jarosite	0.658	0.048
	Goethite	0.31	0.05
	Pyrite	0.033	0.014
TD-1415	Goethite	0.544	0.041
	Jarosite	0.371	0.043
	Pyrite	0.062	0.011
	Siderite	0.023	0.068
TD-1437	Jarosite	0.581	0.029
	Goethite	0.317	0.067
	Horneblende	0.084	0.007
	Pyrite	0.017	0.006
TD-1443	Goethite	0.781	0.015
	Pyrite	0.093	0.007
	Horneblende	0.081	0.011
	Siderite	0.046	0.008
TD-1454	Jarosite	0.639	0.037
	Goethite	0.317	0.04
	Chlorite	0.042	0.012
	Siderite	0.002	0.009
TD-1491	Jarosite	0.687	0.048
	Goethite	0.266	0.044
	Chlorite	0.036	0.012
	Siderite	0.01	0.009
TD-1514	Goethite	0.46	0.045
	Jarosite	0.423	0.037
	Chlorite	0.073	0.119
	Pyrite	0.043	0.008
TD-1530	Goethite	0.659	0.05
	Jarosite	0.34	0.049
	Siderite	0.002	0.009
TD-1536	Jarosite	0.515	0.046
	Goethite	0.466	0.048
	Pyrite	0.019	0.011
TD-1554	Jarosite	0.533	0.04
	Goethite	0.337	0.058
	Magnetite	0.104	0.026
	Siderite	0.026	0.086
TD-1555	Jarosite	0.497	0.055
	Goethite	0.441	0.051
	Pyrite	0.032	0.011
	Siderite	0.03	0.008
TD-1576	Jarosite	0.568	0.045
	Goethite	0.398	0.075
	Pyrite	0.032	0.011
	Siderite	0.002	0.008
TD-1592	Jarosite	0.654	0.063
	Goethite	0.305	0.061
	Chlorite	0.037	0.01
	Pyrite	0.004	0.011
TD-1609	Jarosite	0.675	0.047
	Goethite	0.287	0.058
	Chlorite	0.035	0.01
	Pyrite	0.002	0.075

## Sheet: Fe-Minerals #2
Depth (m)	Sample Name	Climatic Period	Dept (m)	Horneblende		Shoerlite		Pargasite		Olivine		Chlorite		Biotite		Muscovite		Siderite		Magnetite		Goethite		Hematite		Pyrite		Jarosite		Weathering INDEX
269	TD-0269	holocene	0269	42.2	0.8	-	-	-	-	-	-	-	-	-	-	-	-	-	-	-	-	41.3	4.8	11.5	4.7	5	0.8	-	-	0
336	TD-0336	holocene	0336	33.4	9.1	-	-	-	-	-	-	-	-	-	-	-	-	-	-	-	-	46.3	5.2	13.5	5.2	6.8	5.2	-	-	0
385	TD-0385	holocene	0385	25.3	4.9	28.9	0.3	-	-	-	-	-	-	-	-	-	-	-	-	-	-	25.4	-	15.2	2.4	5.2	0.7	-	-	0
422	TD-0422	holocene	0422	39.9	0.9	-	-	-	-	-	-	-	-	-	-	-	-	9.9	0.7	-	-	38.6	5.7	0	-	11.7	0.6	-	-	0
535	TD-0535	holocene	0535	-	-	-	-	23.4	1.2	-	-	-	-	-	-	-	-	6.7	2.6	33.3	1.8	36.5	1.1	0	-	-	-	-	-	0
649	TD-0649	holocene	0649	-	-	-	-	-	-	11.6	1.1	-	-	-	-	49.9	2.2	-	-	-	-	31.9	1.1	0	-	6.6	1.1	-	-	0
666	TD-0666	holocene	0666	-	-	-	-	-	-	-	-	-	-	-	-	30.9	1.8	3.6	2.7	-	-	59.5	1.6	0	-	6	0.6	-	-	0
694	TD-0694	deglaciation	0694	16.2	4.1	-	-	-	-	-	-	-	-	-	-	-	-	7.6	1.1	-	-	71.4	1	-	-	4.8	1	-	-	0
740	TD-0740	deglaciation	0740	13.2	1.3	-	-	-	-	-	-	-	-	-	-	-	-	6.5	2.1	-	-	78.4	0.8	-	-	1.9	0.8	-	-	0
777	TD-0777	deglaciation	0777	29.4	4.7	-	-	-	-	-	-	-	-	-	-	-	-	-	-	-	-	36.3	4.7	30.2	4.7	4.1	3	-	-	0
786	TD-0786	deglaciation	0786	-	-	-	-	-	-	-	-	5.9	4.6	-	-	11.6	4.3	-	-	-	-	62.6	6.4	19.8	9.1	-	-	-	-	0
798	TD-0798	deglaciation	0798	-	-	-	-	-	-	-	-	-	-	-	-	45.3	4.8	6.2	0.6	22.7	1.6	25.9	1.7	-	-	-	-	-	-	0
825	TD-0825	deglaciation	0825	14.7	1.8	-	-	-	-	-	-	-	-	-	-	20.5	3.2	3.1	0.9	-	-	61.6	5	-	-	-	-	-	-	0
828	TD-0828	MIS2	0828	33.1	6.1	-	-	-	-	-	-	-	-	-	-	-	-	-	-	-	-	34.1	3.9	30.5	4.6	2.3	0.8	-	-	0
843	TD-0843	MIS2	0843	-	-	-	-	-	-	-	-	-	-	19.9	1.1	30.5	1.9	-	-	-	-	25.6	1	24	1	-	-	-	-	0
857	TD-0857	MIS2	0857	25.1	0.9	-	-	-	-	-	-	-	-	-	-	19.7	2	-	-	-	-	24	2.9	31.1	2.9	-	-	-	-	0
879	TD-0879	MIS2	0879	17.7	4.3	-	-	-	-	-	-	-	-	-	-	24.4	3.7	2.1	1	-	-	55.7	2.5	-	-	-	-	-	-	0
927	TD-0927	MIS2	0927	19.6	1.5	-	-	-	-	-	-	-	-	-	-	15.2	3.4	-	-	-	-	47.7	5.9	17.5	4.5	-	-	-	-	0
960	TD-0960	MIS3	0960	-	-	-	-	-	-	-	-	15.4	5.1	-	-	26	2.7	2.5	0.7	-	-	56.1	2	-	-	-	-	-	-	0
1025	TD-1025	MIS3	1025	-	-	-	-	-	-	10.4	0.8	-	-	-	-	34.4	2.5	7.2	0.6	-	-	48	2.8	-	-	-	-	-	-	0
1033	TD-1033	MIS3	1033	-	-	-	-	-	-	-	-	-	-	-	-	22.5	2.2	2.4	0.7	-	-	71.5	3.5	-	-	-	-	3.5	6.7	13.4615
1041	TD-1041	MIS3	1041	-	-	-	-	-	-	-	-	-	-	-	-	15.3	1.8	2.9	0.6	-	-	47	2.9	-	-	-	-	34.8	2.3	69.4611
1063	TD-1063	MIS3	1063	-	-	-	-	14.2	0.8	-	-	-	-	-	-	-	-	5.6	0.5	-	-	78.3	0.5	-	-	1.9	1.6	-	-	0
1072	TD-1072	MIS3	1072	9.3	1.7	-	-	-	-	-	-	-	-	-	-	-	-	6.5	3.8	13.4	2.9	70.7	1.8	-	-	-	-	-	-	0
1081	TD-1081	MIS3	1081	-	-	-	-	-	-	-	-	-	-	-	-	16	2.2	4.1	0.7	-	-	69.9	3.4	-	-	-	-	10.1	6.5	38.6973
1096	TD-1096	MIS3	1096	9.4	1.2	-	-	-	-	-	-	-	-	-	-	-	-	2.7	0.8	-	-	52.4	4.7	-	-	-	-	35.6	3.2	79.1111
1097	TD-1097	MIS3	1097	-	-	-	-	10.1	1.4	-	-	-	-	-	-	-	-	5.7	8.3	-	-	81.1	0.9	-	-	3.2	0.8	-	-	0
1112	TD-1112	MIS3	1112	-	-	-	-	13.8	0.7	-	-	-	-	-	-	-	-	6.3	0.4	-	-	75.6	0.5	-	-	4.3	0.9	-	-	0
1132	TD-1132	MIS3	1132	-	-	-	-	-	-	-	-	-	-	-	-	27.6	1.2	-	-	-	-	27.9	0.9	24.1	4.1	-	-	20.4	2.7	28.294
1163	TD-1163	MIS3	1163	14.1	0.9	-	-	-	-	-	-	-	-	-	-	-	-	6.3	0.6	-	-	69.4	5.5	-	-	10.2	0.6	-	-	0
1178	TD-1178	MIS3	1178	9.4	1.2	-	-	-	-	-	-	-	-	-	-	-	-	6.7	0.9	-	-	79.8	0.8	-	-	4	2.1	-	-	0
1182	TD-1182	MIS3	1182	-	-	-	-	-	-	-	-	-	-	-	-	26.8	1	-	-	-	-	-	-	18	1.6	4.5	0.4	50.7	2.1	53.089
1203	TD-1203	MIS3	1203	-	-	-	-	-	-	-	-	1.7	1.2	-	-	-	-	4.4	1	-	-	92.7	5.5	-	-	1.2	0.1	-	-	0
1227	TD-1227	MIS3	1227	-	-	-	-	-	-	-	-	-	-	-	-	39.6	1.6	3.4	3.7	-	-	43.9	2.5	-	-	-	-	13	3.1	24.7148
1265	TD-1265	MIS4	1265	-	-	-	-	-	-	-	-	-	-	-	-	-	-	3.8	5.9	70.4	3.8	-	-	-	-	6.6	1.7	19.2	1.9	100
1289	TD-1289	MIS4	1289	-	-	-	-	-	-	-	-	13.9	1.5	-	-	15.2	3.6	-	-	-	-	61.6	5.8	-	-	-	-	9.3	4	37.9592
1293	TD-1293	MIS5	1293	13.4	2.2	-	-	-	-	-	-	-	-	-	-	10.1	4.4	-	-	-	-	53	4.4	-	-	-	-	23.5	7.8	50
1318	TD-1318	MIS5	1318	7.3	1.6	-	-	-	-	-	-	-	-	-	-	-	-	2.7	1	-	-	57.3	4.4	-	-	-	-	32.7	4	81.75
1385	TD-1361	MIS5	1361	-	-	-	-	-	-	-	-	-	-	-	-	-	-	5.4	0.7	28	8.1	31.6	6	-	-	-	-	34.9	4.1	100
1389	TD-1389	MIS5	1389	-	-	-	-	-	-	-	-	-	-	-	-	-	-	-	-	-	-	31	5	-	-	3.3	1.4	65.8	4.8	100
1415	TD-1415	MIS5	1415	-	-	-	-	-	-	-	-	-	-	-	-	-	-	2.3	6.8	-	-	54.4	4.1	-	-	6.2	1.1	37.1	4.3	100
1437	TD-1437	MIS6	1437	8.4	0.7	-	-	-	-	-	-	-	-	-	-	-	-	-	-	-	-	31.7	6.7	-	-	1.7	0.6	58.1	2.9	87.3684
1443	TD-1443	deep	1443	8.1	1.1	-	-	-	-	-	-	-	-	-	-	-	-	4.6	0.8	-	-	78.1	1.5	-	-	9.3	0.7	0	-	0
1454	TD-1454	deep	1454	-	-	-	-	-	-	-	-	4.2	1.2	-	-	-	-	-	-	-	-	31.7	4	-	-	0.2	0.9	63.9	3.7	100
1491	TD-1491	deep	1491	-	-	-	-	-	-	-	-	3.6	1.2	-	-	-	-	1	0.9	-	-	26.6	4.4	-	-	-	-	68.7	4.8	100
1514	TD-1514	deep	1514	-	-	-	-	-	-	-	-	7.3	1.9	-	-	-	-	-	-	-	-	46	4.5	-	-	4.3	0.8	42.3	3.7	100
1530	TD-1530	deep	1530	-	-	-	-	-	-	-	-	-	-	-	-	-	-	0.2	0.9	-	-	65.9	5	-	-	-	-	34	4.9	100
1536	TD-1536	deep	1536	-	-	-	-	-	-	-	-	-	-	-	-	-	-	-	-	-	-	46.6	4.8	-	-	1.9	1.1	51.5	4.6	100
1554	TD-1554	n.a.	1554	-	-	-	-	-	-	-	-	-	-	-	-	-	-	2.6	8.6	10.4	2.6	33.7	5.8	-	-	-	-	53.3	4	100
1555	TD-1555	n.a.	1555	-	-	-	-	-	-	-	-	-	-	-	-	-	-	3	0.8	-	-	44.1	5.1	-	-	3.2	1.1	49.7	5.5	100
1576	TD-1576	n.a.	1576	-	-	-	-	-	-	-	-	-	-	-	-	-	-	0.2	0.8	-	-	39.8	7.5	-	-	3.2	1.1	56.8	4.5	100
1592	TD-1592	n.a.	1592	-	-	-	-	-	-	-	-	3.7	1	-	-	-	-	-	-	-	-	30.5	6.1	-	-	0.4	1.1	65.4	6.3	100
1609	TD-1609	n.a.	1609	-	-	-	-	-	-	-	-	3.5	1	-	-	-	-	-	-	-	-	28.7	5.7	-	-	0.2	0.2	67.5	4.7	100
